# Supplementary material for: Temperature-induced abrupt volume inflation in the mixed-valence ternary Zintl phase Yb8Ge3Sb5
Source: Royal Society of Chemistry journal article supplement (doi:10.1039/b511606f), 2005-01-01
Supplement: b511606f.pdf [file b511606f.pdf]

**Electronic Supplementary Information for “Temperature-induced abrupt volume inflation in the mixed-valence ternary Zintl phase  $\text{Yb}_8\text{Ge}_3\text{Sb}_5$ ”**

**Serena Margadonna,<sup>a</sup> Kosmas Prassides,<sup>b</sup> Maria Chondroudi,<sup>c</sup> James R. Salvador<sup>c</sup>  
and Mercuri G. Kanatzidis<sup>c</sup>**

<sup>a</sup> *School of Chemistry, University of Edinburgh, Edinburgh, UK EH9 3JJ*

<sup>b</sup> *Department of Chemistry, University of Durham, Durham, UK DH1 3LE*

<sup>c</sup> *Department of Chemistry, Michigan State University, East Lansing, Michigan 48824,  
USA*

**Table 1S. Refined structural parameters for  $\text{Yb}_8\text{Ge}_3\text{Sb}_5$  obtained from the Rietveld refinement of the synchrotron X-ray diffraction data at 5 K.**

| Structural Parameters |       |               |           |               |         |                    |
|-----------------------|-------|---------------|-----------|---------------|---------|--------------------|
|                       | Site  | $x/a$         | $y/b$     | $z/c$         | $N$     | $B (\text{\AA}^2)$ |
| Yb(1)                 | $8i$  | 0.1836(1)     | 0         | 0             | 0.99(3) | 1.57(5)            |
| Yb(2)                 | $8h$  | 0.1282(1)     | 0.1282(1) | $\frac{1}{2}$ | 0.99(3) | 3.14(8)            |
| Yb(3)                 | $16k$ | 0.3548(1)     | 0.1452(1) | $\frac{1}{4}$ | 1.01(2) | 1.30(3)            |
| Sb(1)                 | $8h$  | 0.1987(1)     | 0.1987(1) | 0             | 1.07(5) | 3.60(10)           |
| Sb(2)                 | $8j$  | 0.2713(2)     | 0         | $\frac{1}{2}$ | 1.07(5) | 2.12(8)            |
| Sb(3)                 | $4e$  | 0             | 0         | -0.2442(1)    | 0.96(6) | 3.21(9)            |
| Ge(1)                 | $8i$  | 0.3841(3)     | 0         | 0             | 0.98(9) | 1.36(9)            |
| Ge(2)                 | $4d$  | $\frac{1}{2}$ | 0         | $\frac{1}{4}$ | 0.95(9) | 1.46(9)            |

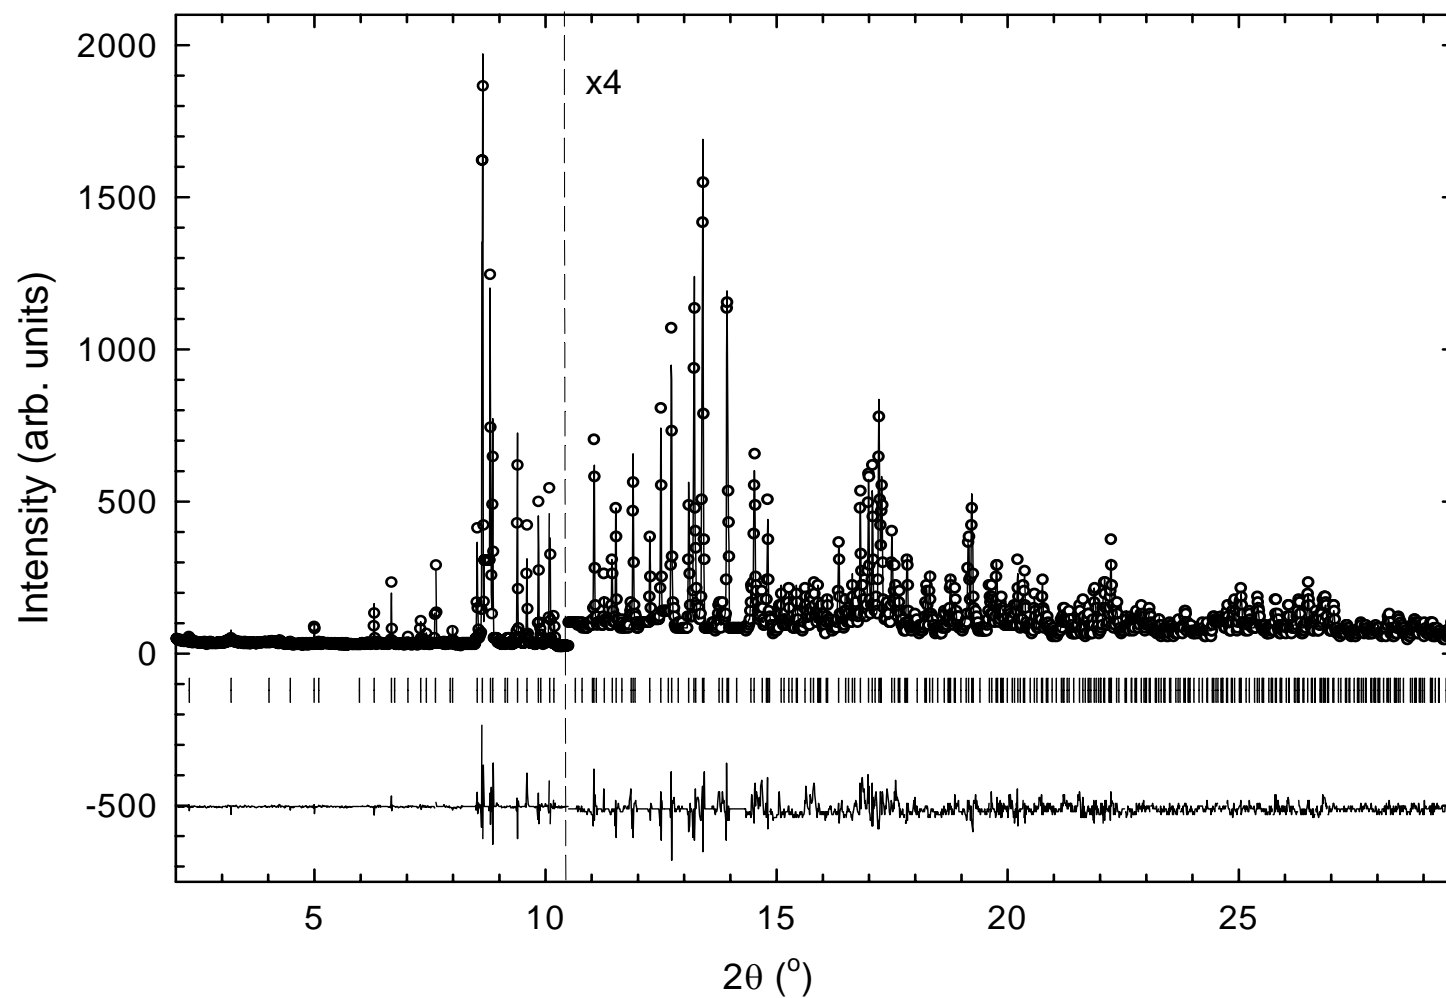

Figure 1S. Final observed ( $\circ$ ) and calculated (solid line) synchrotron X-ray powder ( $\lambda = 0.42976 \text{ \AA}$ ) diffraction profiles for  $\text{Yb}_8\text{Ge}_3\text{Sb}_5$  at 5 K. The lower solid line shows the difference profile and the tick marks show the reflection positions. Some impurity peaks were excluded from the refinement.

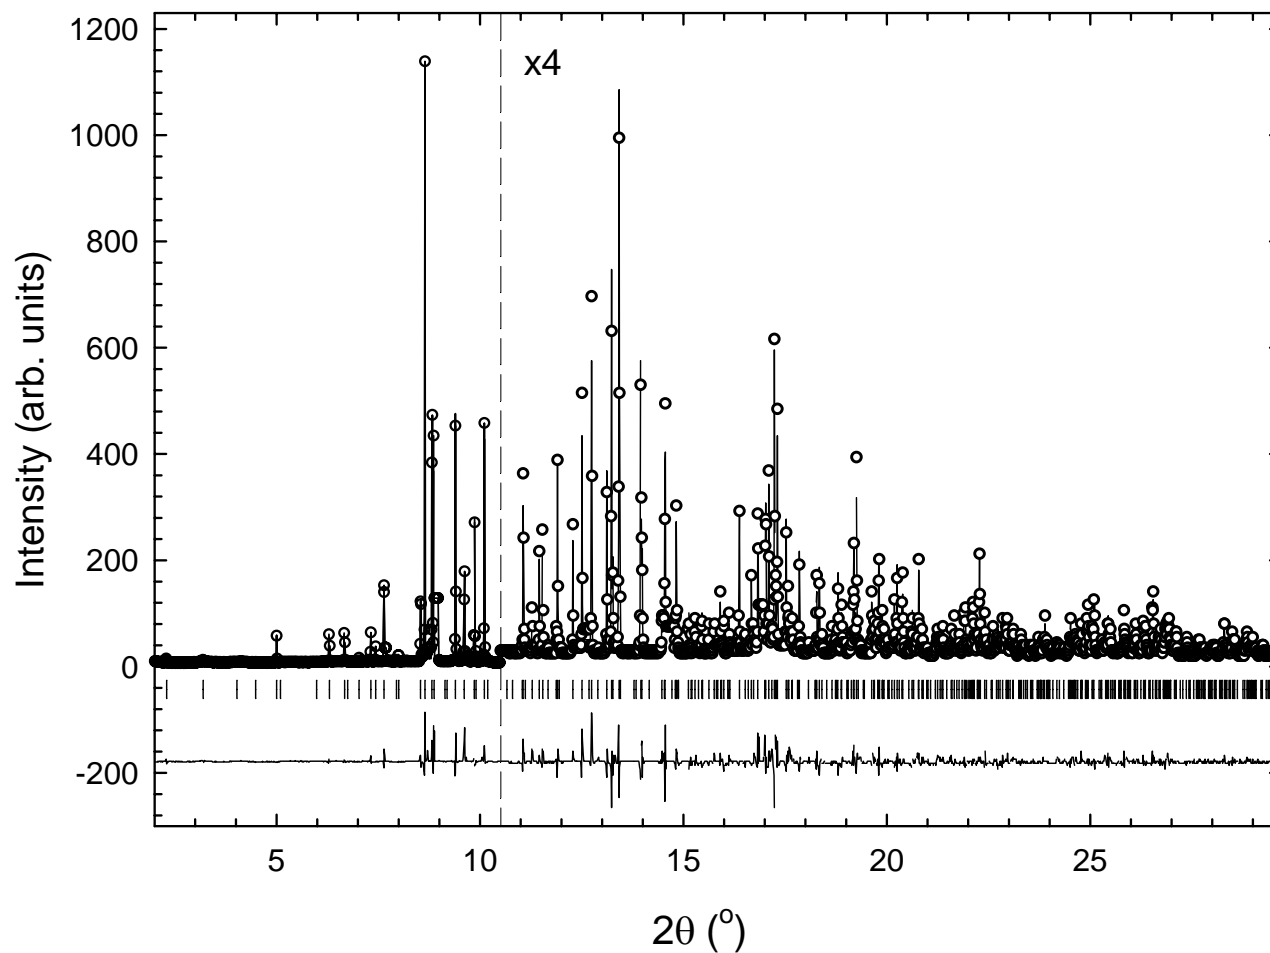

Figure 2S. Final observed ( $\circ$ ) and calculated (solid line) synchrotron X-ray powder ( $\lambda = 0.42976 \text{ \AA}$ ) diffraction profiles for  $\text{Yb}_8\text{Ge}_3\text{Sb}_5$  at 300 K. The lower solid line shows the difference profile and the tick marks show the reflection positions. Some impurity peaks were excluded from the refinement

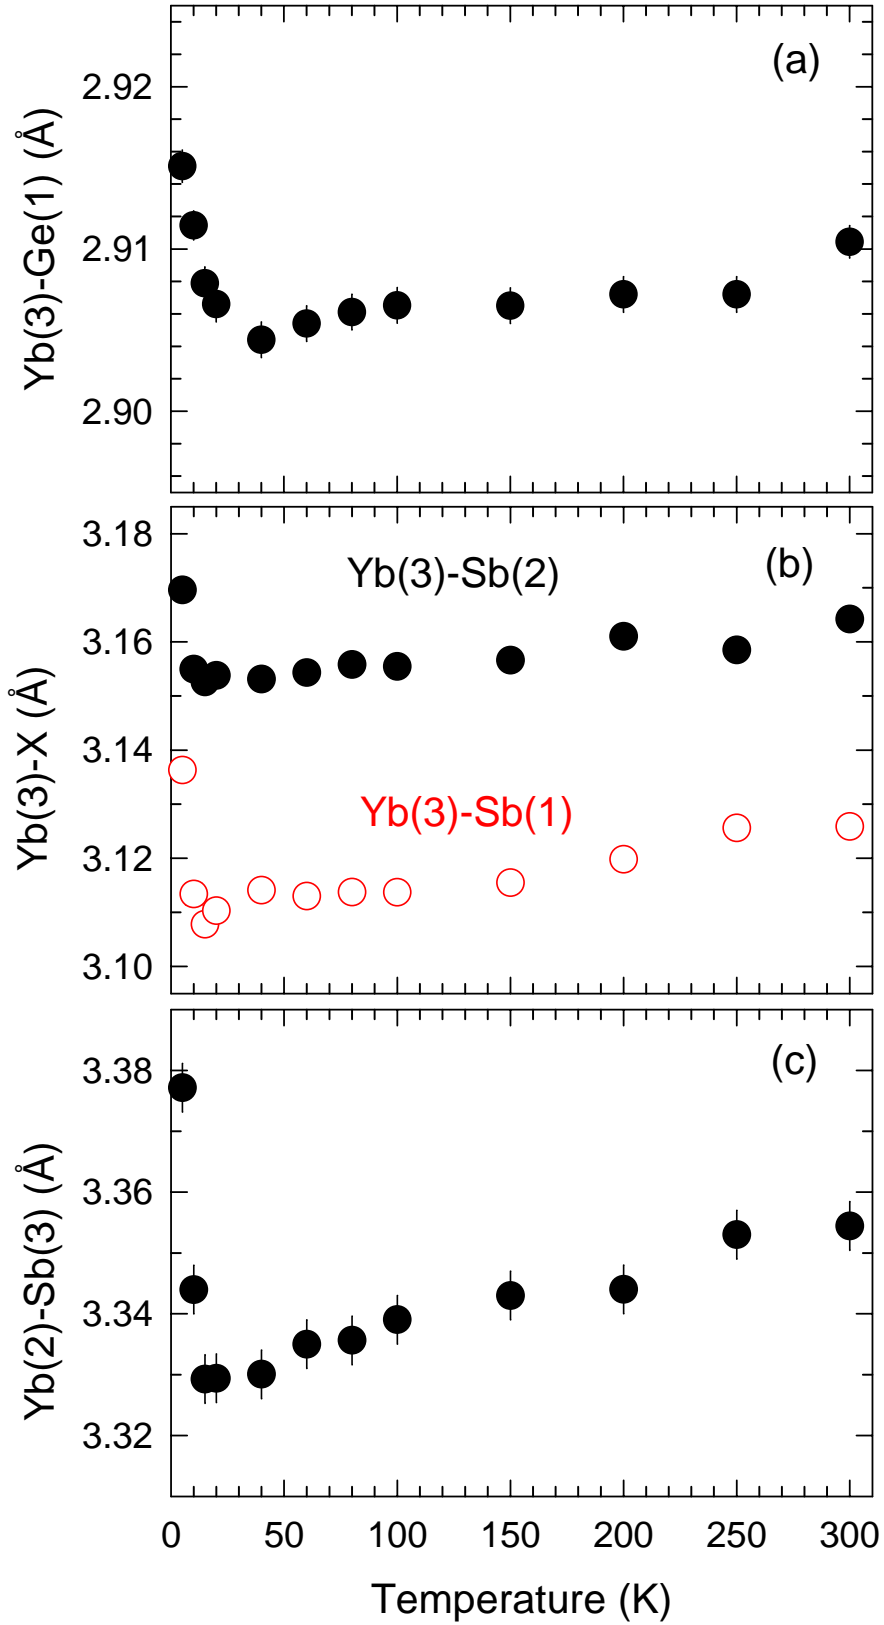

Figure 3S. Temperature dependence of selected interatomic distances in  $\text{Yb}_8\text{Ge}_3\text{Sb}_5$  as obtained from Rietveld refinements of the synchrotron X-ray powder diffraction profiles. (a) Yb(3)-Ge(1). (b) Yb(3)-Sb(1) and Yb(3)-Sb(2). (c) Yb(2)-Sb(3).
